# Supplementary material for: Negative Pressure Wound Therapy versus modified Barker Vacuum Pack as temporary abdominal closure technique for Open Abdomen management: a four-year experience
Source: PubMed Central journal article supplement (PMC5521106; doi:10.1186/s12893-017-0281-3), 2017-07-21
Supplement: 12893_2017_281_MOESM1_ESM.pdf [file 12893_2017_281_MOESM1_ESM.pdf]

| Sesso | età | comorbidità                        | COMORBIDITA   |
|-------|-----|------------------------------------|---------------|
| F     | 56  | K RETTO                            | 9             |
| M     | 55  | CIRROTICO                          | 6             |
| M     | 59  | PREGRESSE RESEZ INT MULTIPLE       | 8             |
| M     | 78  | COLECTOMIA TOT E SPLENECT X        | 1, 9          |
| M     | 56  | IRC IN DIALISI, ESCARE SACRALI,    | 2, 5,         |
| M     | 64  | K GASTRICO RECIDIVO SU MONC        | 8, 9          |
| M     | 57  | PK NECROTICO EMORRAGICA BII        | 8             |
| M     | 33  | PERICARDITE COSTRITTIVA, SC IN     | 1, 2          |
| F     | 66  | K OVAIO CON CP, HIPEC ISTEROA      | 8, 9          |
| M     | 54  | CIRROSI, LE, TOILETTE, SUTURE D    | 6             |
| F     | 84  | IPT ARTER, BPCO, ARTROSI, OSTE     | 1, 2,         |
| M     | 69  | PLT DA PRECIPITAZIONE, GIA TRA     | 0             |
| F     | 67  | IPERT ART, DISTIROID, ASMA, DE     | 1, 2          |
| F     | 77  | RESEZ ILEALE E PLASTIC ADIRETT     | 2, 6          |
| M     | 37  | NO                                 | 0             |
| F     | 46  | TS, DEPRESSIONE                    | 0             |
| M     | 75  | IPERT ART,SC, DM, K SIGMA COM      | 1, 2, 3, 8, 9 |
| F     | 35  | K MAMM QUADRANTECTOMIA I           | 8, 9          |
| M     | 82  | ?                                  | 0             |
| M     | 57  | EPILESSIA, GST PER ULCERA, AOM     | 1, 2          |
| M     | 71  | ARTERIOPATICO                      | 2             |
| F     | 68  | IPERTENS ART                       | 2             |
| M     | 31  | APPENDICECTOMIA                    | 0             |
| F     | 61  | K CIECO CON META EPATICHE :E       | 9             |
| F     | 72  | ESITI DI SD ADERENZIALE. IPERT.    | 2, 9          |
| M     | 50  | CARDIOPATICO, TRAPIANTO CAR        | 1             |
| M     | 52  | IPERTENS ART                       | 2             |
| M     | 75  | BP AO-BIFEM, INFEZ DI PROTESI,     | 1, 2          |
| F     | 45  | TETRAPRESI SPASTICA CONNAT         | 8, 10         |
| M     | 83  | BP AO-BIFEM, CIC, FA, AOMI,        | 1, 2          |
| F     | 66  | LH STADIO IV                       | 9             |
| F     | 42  | NO                                 | 0             |
| M     | 49  | TS, DEPRESSIONE                    | 0             |
| M     | 73  | CIC, BPAC, IPT, TURP, K COLON A    | 1, 2, 9       |
| M     | 72  | STENOSI AO SEVERA:BPAC IL 18/      | 1, 2          |
| M     | 90  | BPCO, FIBRILLO FLUTTER, IRC        | 1, 5          |
| F     | 78  | TIA, ipert art, enfisema, ERNIA JA | 1, 2          |
| M     | 73  | HIV                                | 8             |
| M     | 84  | ALZHEIMER                          | 0             |
| M     | 42  | NO                                 | 0             |



|   |    |                                 |               |
|---|----|---------------------------------|---------------|
| F | 66 | TX RENE DOPPIO COMPLICATA D     | 5             |
| M | 22 | NO                              | 0             |
| M | 58 | CIRROSI EPATICA E HCC           | 6, 9          |
| M | 75 | BILLORTH 2 PER ULCERA, HTA, C   | 1             |
| F | 57 | NO                              | 0             |
| F | 65 | MIELOMA MULTIPLO CON META       | 4, 8, 9       |
| M | 63 | PREGRESSO POTUS, K GASTRICO     | 9             |
| F | 52 | HIV, HCV, CARDIOPATIA, SD NEF   | 8, 1, 2, 5    |
| M | 68 | IPERT ART, COLECISTECTOMIA P    | 2             |
| M | 58 | OBESITA',                       | 2             |
| F | 50 | K ANO CON COLOSTOMIA E RT, F    | 9             |
| F | 77 | K COLON DX INFILTRANTE ILEO E   | 8, 9          |
| M | 57 | IMA CON STENT,SD ANSIOSO DE     | 1             |
| M | 69 | PREGRESSA RIDUZIONE DI ERNIA    | 1             |
| M | 60 |                                 | 2             |
| M | 55 | IPERTEN. ART,PKA LUGLIO 2015    | 1, 2          |
| F | 74 | IPERTENSIONE ART, PREGRESSO     | 1             |
| F | 68 | FA, IPERT ARTERIOSA, IRA, ENCE  | 1, 2, 3, 6, 9 |
| M | 64 | IPERT ART, CIRROSI DA FIBROSI C | 2,5,6         |
| M | 41 | ALCOOL                          | 0             |
| M | 74 | EVAR PER AAA CON STENT AMS      | 2, 1          |
| F | 68 | CIRROSI EPATICA SCOMPENSATA     | 1, 2, 3, 6    |
| M | 71 | 7/12 BYPASS FEMORODISTALE D     | 1, 2          |

60,86597938

63

16,10423655

60,83516484

16,50202933

60,98

17,1196152

| pz in ICU/reparto/ | cause riviste | data 1° intervento |
|--------------------|---------------|--------------------|
| 2                  | 1             | 27/12/11           |
| 3                  | 1             | 21/01/12           |
| 2                  | 1             | 27/01/12           |
| 1                  | 1             | 16/02/12           |
| 1                  | 1             | 01/04/12           |
| 1                  | 1             | 20/04/12           |
| 3                  | 1             | 26/06/12           |
| 2                  | 1             | 11/08/12           |
| 2                  | 1             | 22/08/12           |
| 3                  | 2             | 03/09/12           |
| 2                  | 1             | 12/09/12           |
| 1                  | 2             | 27/09/12           |
| 2                  | 1             | 13/11/12           |
| 3                  | 1             | 28/01/13           |
| 3                  | 2             | 19/02/13           |
| 3                  | 1             | 18/04/13           |
| 3                  | 1             | 07/05/13           |
| 2                  | 1             | 13/05/13           |
| 1                  | 1             | 23/05/13           |
| 2                  | 1             | 18/07/13           |
| 2                  | 1             | 22/07/13           |
| 3                  | 1             | 01/08/13           |
| 3                  | 2             | 06/08/13           |
| 2                  | 1             | 27/08/13           |
| 2                  | 1             | 29/08/13           |
| 2                  | 1             | 13/09/13           |
| 1                  | 1             | 15/11/13           |
| 1                  | 1             | 15/11/13           |
| 2                  | 1             | 26/11/13           |
| 3                  | 1             | 22/12/13           |
| 3                  | 1             | 23/01/14           |
| 3                  | 2             | 05/02/14           |
| 3                  | 2             | 08/03/14           |
| 2                  | 1             | 23/03/14           |
| 1                  | 1             | 08/04/14           |
| 3                  | 1             | 22/04/14           |
| 1                  | 1             | 07/06/14           |
| 1                  | 1             | 21/06/14           |
| 1                  | 1             | 23/06/14           |
| 3                  | 2             | 28/07/14           |

|   |   |          |
|---|---|----------|
| 1 | 1 | 04/08/14 |
| 1 | 1 | 07/08/14 |
| 2 | 1 | 07/08/14 |
| 1 | 1 | 28/08/14 |
| 2 | 1 | 10/09/14 |
| 1 | 1 | 21/09/14 |
| 3 | 2 | 27/09/14 |
| 3 | 1 | 28/09/14 |
| 3 | 2 | 19/03/14 |
| 3 | 2 | 02/10/14 |
| 2 | 1 | 21/10/14 |
| 2 | 1 | 22/10/14 |
| 3 | 1 | 05/11/14 |
| 1 | 1 | 06/11/14 |
| 2 | 1 | 29/11/14 |
| 2 | 1 | 01/12/14 |
| 3 | 2 | 06/12/14 |
| 3 | 2 | 07/12/14 |
| 2 | 1 | 08/12/14 |
| 3 | 1 | 07/01/15 |
| 3 | 2 | 23/01/15 |
| 3 | 1 | 11/03/15 |
| 3 | 1 | 16/03/15 |
| 3 | 1 | 22/03/15 |
| 3 | 1 | 23/03/15 |
| 2 | 1 | 27/03/15 |
| 2 | 1 | 31/03/15 |
| 3 | 2 | 11/04/15 |
| 3 | 2 | 13/04/15 |
| 3 | 2 | 22/04/15 |
| 2 | 1 | 25/05/15 |
| 2 | 1 | 26/05/15 |
| 2 | 1 | 27/05/15 |
| 3 | 2 | 05/06/15 |

|   |   |          |
|---|---|----------|
| 1 | 1 | 06/06/15 |
| 3 | 2 | 27/06/15 |
| 3 | 2 | 30/06/15 |
| 1 | 1 | 23/07/15 |
| 3 | 2 | 28/07/15 |
| 2 | 1 | 31/07/15 |
| 2 | 1 | 08/08/15 |
| 2 | 1 | 09/08/15 |
| 2 | 1 | 25/08/15 |
| 3 | 2 | 26/08/15 |
| 3 | 1 | 31/08/15 |
| 2 | 1 | 03/09/15 |
| 3 | 1 | 17/09/15 |
| 2 | 1 | 25/09/15 |
| 3 | 2 | 05/10/15 |
| 2 | 1 | 10/10/15 |
| 2 | 1 | 11/11/15 |
| 3 | 1 | 17/10/15 |
| 3 | 2 | 22/11/15 |
| 3 | 2 | 19/11/15 |
| 3 | 1 | 05/12/15 |
| 1 | 1 | 05/12/15 |
| 3 | 1 | 17/12/15 |

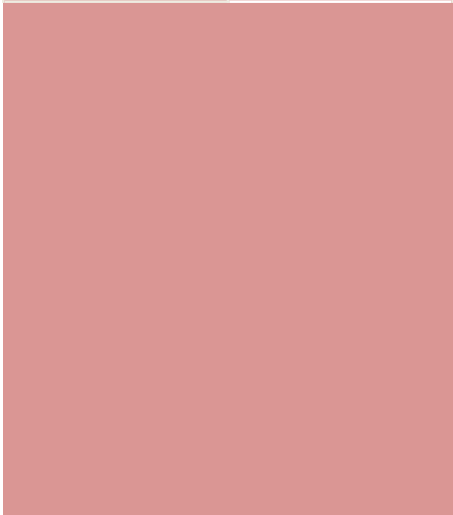

**tipo intervento**

LE, LISI ADER, RES ILEAELE, ILEOSTOM LAT, PACKING PELV

LE, TOILETTE, RESEZ E ANAST ILEALE, BOGOTA BAG

LISI ADERENZE,SUTURE VISCERALI, COLOSTOMIA, BOGOTA BAG

LISI ADER, TOILETTE, BOGOTA BAG

EMIDX ALLARGATA AL TRASVERSO, ILEOSTOMIA

TOILETTE, BOGOTA BAG

NECROSECTOMIA, LISI ADERENZE, ABTHERA

RIMOZIONE DI SOSPETTO EMATOMA INFETTO, BOGOTA BAG

RESEZIONE ILEOSOTMIA, RIILEOSTOMIA, BOGOTA BAG

TOILETTE, BOGOTA BAG

RESEZ ILEO CIEC, BOGOTA BAG

TOILETTE, BOGOTA BAG

SUTURA DI PERF DIGIUNALE IN PKA

RESEZ ILEO-CECALE E EMICOLECT DX, ILEOST TERM, RAFFIA DIGIUNO, BOGOTA BAG

LE, RESEZ TENUE, PACKING ADDOME, ABTHERA

GT, BOGOTA BAG

SEZIONE BRIGLIA, RESEZ ILEALE, ABTHERA

RESEZ ILEO-CECALE E OVAIO, ABTHERA

RESEZIONI ILEALI SENZA ANASTOMOSI, BOGOTA BAG

COLECT SX, SPLENECTOMIA, COLOSTOMIA, ABTHERA

RELAPAROTOMIA, ADESIOLISI, RESEZ DIGIUNOILEALE, ILEOST TERM, ABTHERA

TOILETTE, PATCH OMENTALE SU PERF DUOD

RESEZ INTESTIN, PACKING ADDOM, ABTHERA

TOILETTE, RAFFIA ANSA FISTOLIZZATA, ABTHERA

TOILETTE, ABTHERA

TOILETTE, COLEPERITONEO ??, RACCOLTE SACCATE, FEGATO DA SHOCK, PKA, ABTHERA

NECROSECTOMIA, ABTHERA

TOILETTE, ABTHERA

ABTHERA

TOILETTE, RESEZ ILEALE, RIDUZIONE LAPAROCELE, ILEOST TERM, BOGOTA BAG

RESEZIONE ILEALE, ILEOSTOMIA, ABTHERA

LE, SUTURA PERFORAZIONI DIGIUNALI, PACKING

PACKING EPATICO

ILEOSTOMIA, ABTHERA

COLECISTECTOMIA

COLECTOMIA SUBTOTALE E ILEOSTOMIA T

RESEZ ILEALE, ANASTOM LL, LAPAROSTOMIA

LE, DRENAGGIO PANCREAS, NECROSECTOMIA, ABTHERA

LE, ABTHERA

PACKING EPATICO, RESEZIONE ILEALE, E COLON, CHIUSURA CUTANEA

RESEZIONE ILEALE, ANASTOMOSI LL, COLECISTECTOMIA, LAPAROSTOMIA

RESEZIONE COLICA SUBTOTALE, ILEOSTOMIA TERMINALE, ANATHERA.

LAVAGGIO E ABTHERA

RESEZIONE ILEALE, EMICOLECTOMIA DX ALLARGATA

SUTURA DEISCENZA ANSA AFFERENTE, SUTURA DUODENALE CON PATCH PROT BIO E PATCH DI AF

SUTURA CON PLADGET DELLA PERF DUOD, DRENAGGIO RACCOLTA RETROP, ABTHERA E VAC

RESEZIONE ILEALE, PACKING RETROPERITONEALE E PELVICO, FISSAZIONE BACINO

APPENDICECTOMIA, ABTHERA

LE PACKING EPATICO, CHIUSURA PARETE

PACKING EPATICO, BOGOTA BAG

LAPARO ESPL, RESEZ ILEO TERMIN, ILEOSTOM, CNP

ADESIOLISI, RESEZ DIGIUNO-ILEALE, PACKING PERITON PER SANGUINAM A NAPPO, LAPAROSTOM

RESEZ ILEALE, ANATHERA

EMICOL SX, LISI ADERENZE, COLOSTOMIA TERM, ABTHERA

LISI SI ADERENZE, LAV, DREN, ABTHERA

RELAPAROTOMIA PER DEISC ANAST ILEO-ILEALE, COLECISTECTOMIA PER COLECISTITE GANGRENO

RELAPAROTOMIA, SUTURA DI PERFORAZIONE GASTRICA E TOILETTE, ABTHERA

SPLENECTOMIA, PACKING, TPOD, CHIUSURA CUTE

DEISCENZA ANASTOMOTICA, RESEZIONE, MONCONI LIBERI, ABTHERA

TOILETTE, SUTURA DELLA PERFORAZIONE, COLOSTOMIA DETENSIVA SUL TRASVERSO, ILEOSTOMI

PACKING EPATICO, SUTURA COLON, CHIUSURA CUTE

RESEZIOE DIG ILEALE, ABTHERA

SUTURA DEISC ANAST, COLOST LAT, TOILETTE ABTHERA

RELAP, SUTURA DI PERF ILELAE, ABTHERA

LAP ADESIOLISI RAFFIA PERFORAZIONE RETTO COLOSTOMIA LAT ABTHERA

NEFRECTOMIA DX, COLECISTECTOMA, PACKING LOGGIA REN DX ED EPATIO, ABTHERA

RESEZ COLICA, DRENAGGIO ASCESSO PELVICO, PP,

SPLENECTOMIA PACKING CHIUSURA CUTE

RESEZ COLON TRASV, DIGIUNO PROX, SUTURA PERF DIGIUNALE, PACK RETROPERIT SUTURA LOMI

LE, SUTURA DUODENO E POSIZIONAMENTO DI FOLEY, PACKING, DREN TOR

LE, RESEZ 1 MT INTEST, ABTHERA

SUTURA ILEO, LAVAGGIO, ABTHERA

LE, NON ISCHEMIA, ABTHERA

PACKIN ADDOMIN E PACKING EPAT



COLECTOMIA SUBTOT, COLOSTOMIA, ABTHERA  
LE, PACKING EPATICO, CHIUSURA CUTE  
PACKING EPATICO E ADDOMINALE  
DRENAGGIO RACCOLTE RETROPERITON, RAFFIA ILEALE, ABTHERA  
PACKING PELVICO E CHIUS CUTE, SPLENECTOMIA, CISTOSTOMIA, PACKING ADDOME CHIUSA CUT  
COLECISTECTOMIA LISI ADERENZE, LAPAROSTOMIA  
LAVAGGIO E DRENAGGIO, PACKING  
RESEZIONE SIGMA, LAVAGGIO, ABBANDONO MONCONI, CNP  
LAP, LAVAGGIO, COLECISTECTOMIA, CONTROLLO DUODENO, CNP  
LAPARO ESPL SPLENECTOMIA, PACKING EPATICO E DUODEN, DREN TORACICO  
LAPAROTOM, RESEZIONE ILEALE, CNP  
RELAP, REANASTOMOSI ILEOCECALE  
RELAP, LISI ADERENZE, SUTURA DUODEN, TOILETTE RACCOLTA PURULENTA  
RELAP, GASTRECT TOTALE, NECROSI ESOF DISTALE, VERSAM PLEURICO E RACCOLTA PARAESOFAG  
LAP ESPL PACKING  
LAP EXPLO, PERITONITE SIEROPURULENTA, TOILETTE PERITON, ASPORTAZIONE VII-VIII SEGM DI LE  
RELAP, TPILETTE, RESEZ ILEALE DUPLICE, SUTURA DI PERF DIGIUNO  
RESEZIONE ILEALE 1 MT, CNP  
LAP, SINTESI MESO, PACKING, CHIUS CUTE, IAP AL TERMINE 5  
LAP, EMOSTASI EPATICA E SPLENICA, SUTURA MESO COLON TRASV, PACKING, CHIUS FASCIA E CU  
LAP ESP, ISCHEMIA INTEST DIFFUSA RESEZ COLON SX E SIGMA E ILEO PARZIALE, CNP  
LAP ESPL, RESEZIONE ILEO MARCIO, ABTHERA  
EMICOLECTOMIA SX, LISI DI ADERENZE, TOILETTE PERITONEALE, COLECISTECTOMIA, CNP, PACKIN

| ASA | ISS | open abdomen c | MPI | DRCK ALLA CHIUSU |
|-----|-----|----------------|-----|------------------|
| 4   |     | Ia             | 35  | 1a               |
| 3   |     | Ic             | 27  | 1a               |
| 3   |     | Iic            | 28  | 2a               |
| 4   |     | Ila            | 30  | 1a               |
| 4   |     | Ic             | 30  | 1a               |
| 3   |     | Iib            | 32  | 4                |
| 2   |     | Iib            | 0   | 1a               |
| 4   |     | Ib             | 25  | 1a               |
| 4   |     | Iic            | 47  | 1a               |
| 5   | 21  | Iic            | 34  | 1a               |
| 4   |     | Iib            | 27  | 1a               |
| 5   | 35  | Ib             | 26  | 1a               |
| 4   |     | Ic             | 33  | 1a morto         |
| 4   |     | Iic            | 39  | 1a               |
| 5   | 41  | Ic             | 29  | 2a               |
| 1   |     | Ib             | 22  | 1b morto         |
| 4   |     | Illa           | 24  | 1a               |
| 4   |     | Iic            | 34  | 1a               |
| 2   |     | Ib             | 22  | 2a               |
| 4   |     | Iib            | 22  | 1a               |
| 3   |     | Iic            | 38  | 2a               |
| 2   |     | Iic            | 30  | 2b               |
| 5   | 26  | Ic             | 29  | 1a               |
| 4   |     | Iic            | 36  | 2a               |
| 4   |     | Iic            | 39  | 2a               |
| 4   |     | Iib            | 28  | 1a               |
| 2   |     | Ib             | 22  | 1a               |
| 4   |     | Ib             | 26  | 1a               |
| 4   |     | Ib             | 23  | 1a               |
| 4   |     | Iic            | 27  | 1a               |
| 4   |     | Ib             | 25  | 1a               |
| 5   | 26  | Iic            | 34  | 1a               |
| 5   | 29  | Ia             | 0   | 1a               |
| 4   |     | Iic            | 27  | 2a               |
| 4   |     | Ib             | 16  | 1a               |
| 4   |     | Ib             | 16  | 1a               |
| 4   |     | Iib            | 43  | 1a               |
| 3   |     | Ib             | 26  | 2a               |
| 3   |     | Ia             | 0   | 1a               |
| 5   | 29  | Ic             | 0   | 1a               |

|   |    |      |    |          |
|---|----|------|----|----------|
| 3 |    | lic  | 39 | 1a       |
| 4 |    | lc   | 34 | 2a       |
| 4 |    | lb   | 18 | 1a       |
| 4 |    | lib  | 22 | 1a       |
| 4 |    | lib  | 33 | 4        |
| 4 |    | lia  | 15 | 1a       |
| 5 | 54 | la   | 0  | 1a       |
| 4 |    | lb   | 30 | 1a       |
| 5 | 43 | la   | 0  | 1a       |
| 5 | 35 | la   | 0  | 1a       |
| 4 |    | lb   | 0  | 2a       |
| 4 |    | lllb | 0  | 2a       |
| 3 |    | lc   | 38 | 1b morto |
| 3 |    | llb  | 26 | 1a       |
| 1 |    | llb  | 26 | 1a       |
| 4 |    | lb   | 33 | 1a       |
| 4 | 57 | llb  | 15 | 1a       |
| 5 | 41 | la   | 0  | 1a       |
| 4 |    | lic  | 32 | 2a       |
| 3 |    | lc   | 23 | 1a       |
| 5 | 41 | la   | 0  | 1a       |
| 5 |    | la   | 0  | 1a       |
| 3 |    | lib  | 36 | 1a       |
| 3 |    | lc   | 21 | 1a       |
| 4 |    | lic  | 25 | 2a       |
| 4 |    | la   | 21 | 1a       |
| 4 |    | lic  | 26 | 2a       |
| 5 | 50 | la   | 0  | 1a       |
| 5 | 50 | lic  | 17 | 1a       |
| 5 | 34 | lc   | 13 | 1a       |
| 4 |    | lic  | 34 | 1a       |
| 2 |    | lic  | 32 | 2a       |
| 4 |    | la   | 0  | 1a       |
| 5 | 48 | la   | 0  | 1a morto |

|   |    |     |    |          |
|---|----|-----|----|----------|
| 4 |    | lb  | 23 | 2a morto |
| 5 | 38 | la  | 0  | 1a       |
| 5 | 59 | la  | 0  | 1a morto |
| 2 |    | lc  | 9  | 1a       |
| 5 | 48 | la  | 0  | 1a morta |
| 4 |    | lb  | 41 | 1a       |
| 3 |    | lb  | 23 | 1a       |
| 4 |    | lic | 39 | 1a       |
| 3 |    | lib | 32 | 2a       |
| 5 | 41 | la  | 0  | 1a morta |
| 3 |    | lb  | 32 | 2a       |
| 3 |    | lb  | 40 | 1a       |
| 4 |    | lic | 26 | 1a       |
| 3 |    | lc  | 22 | 2a       |
| 5 | 59 | la  | 0  | 1a       |
| 2 |    | lib | 28 | 2a       |
| 4 |    | llc | 36 | 1a       |
| 4 |    | lb  | 15 | 1a       |
| 5 | 29 | la  | 0  | 1a       |
| 5 | 41 | la  | 0  | 1A       |
| 5 |    | lb  | 26 | 1a       |
| 5 |    | lb  | 37 | 1b       |
| 4 |    | lib | 34 | 2a       |

|             |             |             |
|-------------|-------------|-------------|
| 3,886597938 | 40,625      | 21,88659794 |
| 0,956080199 | 41          | 26          |
|             | 10,92588669 | 13,69753345 |
| 3,912087912 |             |             |
| 0,924380254 |             |             |
|             | 9,882082552 |             |
| 0,911603208 | 33,9        |             |
| 3,84        |             |             |
|             | 41,57894737 |             |
|             | 10,10674027 |             |

| Temporary Abdon | NUM MEDICAZIONI | lot gg per la chiusura | protesi | tipo protesi (bio/v |
|-----------------|-----------------|------------------------|---------|---------------------|
| 2               | 5               | 9                      | 2       |                     |
| 2               | 3               | 7                      | 2       |                     |
| 2               | 10              | 16                     | 1       | COLLAMED            |
| 2               | 2               | 2                      | 2       |                     |
| 2               | 2               | 2                      | 2       |                     |
| 2               | 8               | NON CHIUSO             |         |                     |
| 1               | 3               | 5                      | 2       |                     |
| 2               | 3               | 6                      | 2       |                     |
| 2               | 4               | 9                      | 1       | VICRYL              |
| 2               | 2               | 2                      | 2       |                     |
| 2               | 4               | 11                     | 1       | VICRYL              |
| 2               | 3               | 4                      | 2       |                     |
| 2               | 3               | NON CHIUSO             |         |                     |
| 2               | 3               | 4                      | 1       | BIODESIGN           |
| 1               | 5               | 6                      | 2       |                     |
| 2               | 3               | NON CHIUSA             |         |                     |
| 2               | 6               | 13                     | 1       | VICRYL              |
| 1               | 3               | 4                      | 1       | COLLAMED            |
| 2               | 2               | 3                      | 2       |                     |
| 1               | 4               | 7                      | 2       |                     |
| 1               | 4               | 7                      | 2       |                     |
| 1               | 10              | 20                     | 1       | SURGISIS            |
| 1               | 4               | 7                      | 2       |                     |
| 1               | 4               | 7                      | 2       |                     |
| 1               | 4               | 7                      | 1       | SURGISIS            |
| 1               | 3               | 9                      | 1       | VICRYL              |
| 1               | 7               | 16                     | 1       | VICRYL              |
| 1               | 3               | 4                      | 2       |                     |
| 1               | 2               | 2                      | 1       | VICRYL              |
| 2               | 4               | 5                      | 2       |                     |
| 1               | 3               | 7                      | 2       |                     |
| 1               | 4               | 6                      | 1       | PROTEXA             |
| 3               | 2               | 2                      | 2       |                     |
| 1               | 4               | 8                      | 1       | PROTEXA             |
| 1               | 3               | 6                      | 1       | SURGISIS            |
| 1               | 3               | 4                      | 2       |                     |
| 1               | 5               | 10                     | 1       | PROTEXA             |
| 1               | 6               | 15                     | 1       | PROTEXA             |
| 1               | 2               | 2                      | 2       |                     |
| 3               | 2               | 1                      | 2       |                     |



|             |   |            |   |         |
|-------------|---|------------|---|---------|
| 1           | 1 | NON CHIUSA |   |         |
| 3           | 3 | 5          | 2 |         |
| 3           | 2 | NON CHIUSO |   |         |
| 1           | 2 | 2          | 2 |         |
| 3           | 1 | NON CHIUSO |   |         |
| 1           | 2 | 3          | 2 |         |
| 1           | 2 | 2          | 2 |         |
| 1           | 2 | 2          | 2 |         |
| 1           | 2 | 2          | 2 |         |
| 1           | 1 | NON CHIUSO |   |         |
| 1           | 4 | 8          | 2 |         |
| 1           | 2 | 3          | 2 |         |
| 1           | 2 | 4          | 2 |         |
| 1           | 5 | 11         | 1 | PROTEXA |
| 3           | 2 | 1          | 2 |         |
| 1           | 2 | 2          | 2 |         |
| 1           | 3 | 6          | 1 | PROTEXA |
| 1           | 2 | 2          | 2 |         |
| 3           | 2 | 3          | 2 |         |
| 3           | 6 | 11         | 1 | PROTEXA |
| 1 + tension | 4 | 6          | 1 | VICRYL  |
| 1           | 2 | 2          | 2 |         |
| 1           | 3 | 4          | 1 | VICRYL  |

3,268041237  
3 5,632183908  
1,895803831 4,585403897

3,153846154  
1,731557275

3,8  
1,958758457

| DIMENS PROTESI | sede | chiusura fascia | 2 ..npwt bogota - chiusura fascia |
|----------------|------|-----------------|-----------------------------------|
|                |      | 1               | 1                                 |
|                |      | 1               | 1                                 |
| 10*15 E 18*23  | 3    | 1               | 1                                 |
|                |      | 1               | 1                                 |
|                |      | 1               | 1                                 |
|                |      | 2               | 2                                 |
|                |      | 1               | 1                                 |
|                |      | 1               | 1                                 |
|                | 3    | 1               | 1                                 |
|                |      | 1               | 1                                 |
|                | 4    | 1               | 1                                 |
|                |      | 1               | 1                                 |
|                |      |                 |                                   |
| 20*30          | 3    | 1               | 1                                 |
|                |      | 1               | 1                                 |
|                |      |                 |                                   |
| 20*30          | 5    | 1               | 1                                 |
| 18*26          | 5    | 1               | 1                                 |
|                |      | 1               | 1                                 |
|                |      | 1               | 1                                 |
|                | 5    | 1               | 1                                 |
|                |      | 1               | 1                                 |
|                |      | 1               | 1                                 |
| 20*30          | 3    | 2               | 2                                 |
|                | 5    | 1               | 1                                 |
|                | 2    | 2               | 2                                 |
|                |      | 1               | 1                                 |
|                | 2    | 2               | 2                                 |
|                |      | 1               | 1                                 |
|                |      | 1               | 1                                 |
|                | 3    | 1               | 1                                 |
|                |      | 1               |                                   |
|                | 3    | 1               | 1                                 |
| 20*30          | 5    | 1               | 1                                 |
|                |      | 1               | 1                                 |
| 20*30          | 3    | 2               | 2                                 |
|                | 3    | 1               | 1                                 |
|                |      | 1               | 1                                 |
|                |      | 1               |                                   |



|       |   |   |   |
|-------|---|---|---|
|       | 5 | 1 | 1 |
|       |   | 1 | 1 |
|       | 1 | 2 | 2 |
| 25*18 | 1 | 1 | 1 |
|       |   | 2 | 2 |
|       | 5 | 2 | 2 |
|       | 3 | 1 | 1 |
|       | 5 | 2 | 2 |
|       |   | 1 |   |
|       | 3 | 1 | 1 |
|       | 2 | 2 | 2 |
| 20*30 | 5 | 2 | 2 |
|       |   |   |   |
| 20*30 | 2 | 1 | 1 |
|       |   | 1 | 1 |
|       | 2 | 2 | 2 |
|       |   | 1 | 1 |
|       |   | 1 |   |
|       |   | 1 | 1 |
| 30*20 | 3 | 1 | 1 |
|       |   | 1 |   |
|       |   | 1 | 1 |
|       |   | 1 | 1 |
| 20*30 | 3 | 1 | 1 |
|       |   |   |   |
|       |   |   |   |
| 20*20 | 3 | 1 | 1 |
|       |   | 1 | 1 |
| 30*20 | 5 | 1 | 1 |
|       |   | 1 |   |
|       | 5 | 1 |   |
|       |   | 1 |   |
|       |   | 1 | 1 |
|       | 3 | 1 | 1 |
|       | 1 | 2 | 2 |
|       |   |   |   |

|       |   |   |   |
|-------|---|---|---|
|       |   |   |   |
|       |   | 1 |   |
|       |   |   |   |
|       |   | 1 | 1 |
|       |   |   |   |
|       |   | 1 | 1 |
|       |   | 1 | 1 |
|       |   | 1 | 1 |
|       |   | 1 | 1 |
|       |   |   |   |
|       |   | 1 | 1 |
|       |   | 1 | 1 |
|       |   | 1 | 1 |
| 20*30 | 2 | 2 | 2 |
|       |   | 2 |   |
|       |   | 1 | 1 |
| 20*30 | 2 | 2 | 2 |
|       |   | 1 | 1 |
|       |   | 1 |   |
| 20*30 | 2 | 2 |   |
|       | 5 | 1 | 1 |
|       |   | 2 | 2 |
|       | 3 | 1 | 1 |

| anastomosi prima stomia | TIPO               |
|-------------------------|--------------------|
| 2                       | 1 ILEO             |
| 1                       | 2                  |
| 1                       | 1 COLO             |
| 2                       | 2                  |
| 2                       | 1 ILEO             |
|                         |                    |
| 2                       | 2                  |
| 2                       | 2                  |
| 2                       | 1 ILEO-TRASVERSO   |
| 2                       | 2                  |
| 1                       | 1 ILEO             |
| 2                       | 2                  |
|                         |                    |
| 2                       | 1 ILEO             |
| 1                       | 2                  |
|                         |                    |
| 1                       | 1 ILEO             |
| 1                       | 2                  |
| 2                       | 2                  |
| 2                       | 1 COLO             |
| 1                       | 1 ILEO             |
| 2                       | 2                  |
| 1                       | 2                  |
| 1                       | 1 ILEO             |
| 1                       | 1 BRICKER, DIGIUNO |
| 2                       | 2                  |
| 2                       | 1 DIGIUNO          |
| 2                       | 2                  |
| 2                       | 2                  |
| 1                       | 2                  |
|                         |                    |
| 2                       | 2                  |
| 1                       | 1 ILEO             |
| 1                       | 2                  |
| 2                       | 1 DIGIUNO          |
| 2                       | 2                  |
| 1                       | 2                  |

|   |   |            |
|---|---|------------|
| 1 | 2 |            |
| 2 | 1 | ILEO       |
| 1 | 2 |            |
| 1 | 2 |            |
| 1 | 2 |            |
| 2 | 2 |            |
| 1 | 2 |            |
| 1 | 2 |            |
| 2 | 2 |            |
| 2 | 2 |            |
| 1 | 2 |            |
| 1 | 2 |            |
|   |   |            |
| 2 | 1 | COLO       |
| 2 | 2 |            |
| 1 | 1 | COLO       |
| 2 | 2 |            |
| 2 | 2 |            |
| 1 | 2 |            |
| 2 | 1 | COLO       |
| 2 | 2 |            |
| 1 | 2 |            |
| 1 | 1 | COLO       |
| 2 | 2 |            |
|   |   |            |
|   |   |            |
|   |   |            |
|   |   |            |
|   |   |            |
| 2 | 1 | COLON TERM |
| 2 | 2 |            |
| 2 | 1 | COLON TERM |
| 2 | 2 |            |
| 2 | 2 |            |
| 1 | 1 | DIGIUNO    |
| 2 | 1 | ILEO TERM  |
| 1 | 2 |            |
| 2 | 2 |            |
|   |   |            |

|   |   |            |
|---|---|------------|
|   |   |            |
| 2 | 2 |            |
|   |   |            |
| 1 | 2 |            |
|   |   |            |
| 2 | 2 |            |
| 1 | 2 |            |
| 2 | 1 | COLON TERM |
| 2 | 2 |            |
|   |   |            |
| 1 | 1 | COLOST     |
| 1 | 2 |            |
| 2 | 2 |            |
| 1 | 1 | DIGIUNO    |
| 2 | 2 |            |
| 2 | 2 |            |
| 1 | 2 |            |
| 1 | 2 |            |
| 2 | 2 |            |
| 2 | 2 |            |
| 1 | 1 | COLO       |
| 2 | 2 |            |
| 2 | 1 | COLO       |

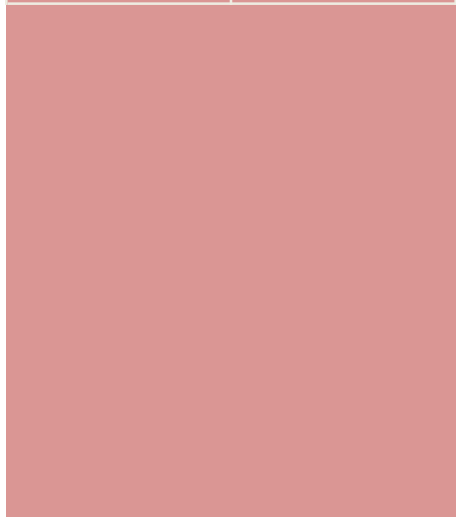

| complicanze                                                     | fistola si/no |
|-----------------------------------------------------------------|---------------|
| NO                                                              | 2             |
| NO                                                              | 2             |
| DEISC ANASTOM, 29/2 PERITONITE STERCORACEA E EMOPERITON DA SANG | 1             |
| NO                                                              | 1             |
| DEISCENZA FERITA?                                               | 1             |
| PKA NECROT EMORR, DEISCENZA ESOF DIGIUN                         | 1             |
| MOF, IRZ E IRESP++                                              | 2             |
| NO                                                              | 2             |
| DEISC FERITA, VAC                                               | 2             |
| NO                                                              | 2             |
| NO                                                              | 2             |
| NO                                                              | 2             |
|                                                                 | 1             |
| FISTOLA E-C TTT CONSERVATIVO                                    | 2             |
| DEISC FERITA                                                    | 2             |
|                                                                 | 1             |
| 2 FISTOLA ANAST, SD INT CORTO NPT                               | 1             |
| NO                                                              | 2             |
| NO                                                              | 1             |
| NO                                                              | 2             |
| NO                                                              | 2             |
| DEISC FERITA                                                    | 2             |
| NO                                                              | 2             |
| PICCOLA DEISC FERITA                                            | 2             |
| SUBOCC INTESTINALI TTT MEDICO                                   | 2             |
| NO                                                              | 2             |
| LAPAROCELE (IRA POST-OP, FISTOLA PK BASSA PORT, INFEZ ADD, DM)  | 2             |
| DEISC FERITA                                                    | 1             |
| DEISC FERITA                                                    | 2             |
| NO                                                              | 2             |
| NO                                                              | 2             |
| NO                                                              | 2             |
| NO                                                              | 2             |
| INFEZ FERITA                                                    | 2             |
| NO                                                              | 1             |
| NO                                                              | 2             |
| NO                                                              | 2             |
| NO                                                              | 2             |
| NO                                                              | 2             |

|                                                                    |   |
|--------------------------------------------------------------------|---|
| NO                                                                 | 2 |
| DEISCENZA FERITA E VAC                                             | 2 |
| NO                                                                 | 2 |
| DEISCENZA FERITA PICCOLA, SIERO                                    | 2 |
| FISTOLA E-C TTT CONSERVATIVO E VAC                                 | 1 |
| NO                                                                 | 1 |
| NO                                                                 | 2 |
| NO                                                                 | 2 |
| NO                                                                 | 2 |
| NO                                                                 | 2 |
| FISTOLA E-CUT, NO SUI PLADGET ALLE ANASTOMOSI                      | 1 |
| DEISC FERITA IMPORTANTE                                            | 2 |
| NO                                                                 | 1 |
| NO                                                                 | 1 |
| NO                                                                 | 2 |
| DEISC ANASTOM                                                      | 1 |
| NO                                                                 | 2 |
| NO                                                                 | 2 |
| FISTOLA ENTERICA BASSA PORTATA RISOLTASI                           | 1 |
| NO                                                                 | 2 |
| NO                                                                 | 2 |
| NO                                                                 | 2 |
| NO                                                                 | 2 |
| NECROSI PARETE CUTANEA , EMATOMA PARTE IN ESITI DI ALLOPLASTICA CC | 2 |
| NO                                                                 |   |
|                                                                    | 2 |
| NO                                                                 | 2 |
| ECO PARETE PER RACCOLTA SOPRAFASCIALE, DEISC FERITA ZAFFATA        | 2 |
| NO                                                                 | 2 |
| MEDICAZIONI VAC LOMBARE, INFEZ DA KPC,                             | 2 |
| NO                                                                 | 2 |
| RACCOLTE ADDOMIN TTT CON DREN TC,                                  | 2 |
| INFEZ FERITA, FEC, SD INTESTINO CORTO                              | 1 |
| NO                                                                 | 1 |
|                                                                    | 1 |

|                                                                |   |
|----------------------------------------------------------------|---|
|                                                                | 1 |
| NO                                                             | 2 |
| MORTO IN SALA                                                  | 1 |
| NO                                                             | 2 |
| MORTO IN RIA                                                   | 1 |
| NO                                                             | 2 |
| FISTOLA BILIARE, EMOPERITONEO REOP IL 25/8, CNP                | 1 |
| INFEZ FERITA                                                   | 2 |
| NO                                                             | 2 |
|                                                                | 1 |
| SANGUINAM DALL'ANASTOMOSI E PERFORAZ ANAST                     | 1 |
| RITARDO CANALIZZAZIONE, DEISC FERITA                           | 2 |
| RIPRESA FISTOLA DUOD POI CHIUSA SPONTANEAM                     | 2 |
| DEISC ANASTOM, REINTERV PER CERVICOSTOMIA                      | 1 |
| NO                                                             | 2 |
| NO                                                             | 2 |
| NO                                                             | 2 |
| NO                                                             | 2 |
| NO                                                             | 1 |
| SD COMPARTIM RISOLTASI, NECROSI FERITA E MINIMO LIQ SIEROSO    | 2 |
| NO                                                             | 2 |
| NO                                                             | 1 |
| SI RIAPERTURE PER SANGUINAMENTO CON REPACKING, RELAPAROSTOMIA, | 1 |



| decesso peri op | CAUSA DECESSO    | degenza ICU | degenza H (GG) | altro            |
|-----------------|------------------|-------------|----------------|------------------|
| 2               |                  | 12          | 71             |                  |
| 1               | SEPSI            | 6           | 30             |                  |
| 1               | SEPSI            | 28          | 101            |                  |
| 1               | IMA E SHOCK CAR  | 20          | 20             |                  |
| 1               | SEPSI            | 10          | 45             |                  |
| 1               | ISCHEMIA ESOFAG  | 17          | 20             |                  |
| 2               |                  | 41          | 60             | LAPAROCELE A 6 M |
| 2               |                  | 58          | 117            |                  |
| 2               |                  | 22          | 78             | A 30 GG RICOVERC |
| 2               |                  | 7           | 17             |                  |
| 2               |                  | 36          | 98             |                  |
| 2               |                  | 20          | 61             |                  |
| 1               | SHOCK EMORRAG    | 16          | 90             |                  |
| 2               | INSUF RESP       | 71          | 98             |                  |
| 2               |                  | 41          | 98             |                  |
| 1               | MOF PER ISCHEMI  | 4           | 0              |                  |
| 2               |                  | 27          | 53             |                  |
| 2               |                  | 47          | 61             |                  |
| 1               | mof?             | 66          | 69             |                  |
| 2               |                  | 71          | 80             |                  |
| 1               | COMA             | 11          | 7              |                  |
| 2               |                  | 69          | 97             |                  |
| 2               |                  | 10          | 29             |                  |
| 2               |                  | 2           | 65             |                  |
| 2               |                  | 45          | 144            |                  |
| 2               |                  | 40          | 20             | EMODIALISI       |
| 2               |                  | 41          | 64             |                  |
| 1               | SEPSI            | 2           | 88             |                  |
| 2               |                  | 7           | 46             |                  |
| 1               | SEPSI            | 11          | 17             |                  |
| 2               |                  | 23          | 31             |                  |
| 2               |                  | 10          | 18             |                  |
| 2               |                  | 6           | 11             |                  |
| 2               |                  | 19          | 39             |                  |
| 1               | INSUFF RESP      | 7           | 48             | GASTRECTOMIA T   |
| 1               | INFARTO INTESTIN | 12          | 4              |                  |
| 2               |                  | 73          | 96             |                  |
| 2               |                  | 23          | 42             |                  |
| 2               |                  | 19          | 48             |                  |
| 2               |                  | 37          | 50             |                  |

|   |                   |    |     |  |
|---|-------------------|----|-----|--|
| 1 |                   | 33 | 43  |  |
| 2 |                   | 19 | 53  |  |
| 2 |                   | 37 | 45  |  |
| 2 |                   | 43 | 74  |  |
| 2 |                   | 21 | 154 |  |
| 1 | FISTOLA AORTICA   | 20 | 30  |  |
| 2 |                   | 20 | 39  |  |
| 2 |                   | 20 | 38  |  |
| 2 |                   | 10 | 22  |  |
| 2 |                   | 19 | 72  |  |
| 2 |                   | 60 | 60  |  |
| 2 |                   | 16 | 24  |  |
| 1 | SEPSI             | 1  | 0   |  |
| 1 | SEPSI             | 20 | 50  |  |
| 2 |                   | 4  | 14  |  |
| 1 | SEPSI DA DEISC AN | 10 | 10  |  |
| 2 |                   | 43 | 57  |  |
| 2 |                   | 7  | 24  |  |
| 2 |                   | 21 | 27  |  |
| 2 |                   | 6  | 20  |  |
| 2 |                   | 5  | 25  |  |
| 2 |                   | 21 | 21  |  |
| 2 |                   | 5  | 43  |  |
| 2 |                   | 20 | 39  |  |
| 2 |                   | 10 | 42  |  |
| 2 |                   | 51 | 69  |  |
| 2 |                   | 17 | 15  |  |
| 2 |                   | 10 | 14  |  |
| 2 |                   | 30 | 58  |  |
| 2 |                   | 5  | 16  |  |
| 2 |                   | 6  | 23  |  |
| 2 |                   | 8  | 38  |  |
| 1 | I RESP            | 38 | 58  |  |
| 1 | SHOCK EMORRAG     | 1  | 1   |  |

|   |                     |    |    |  |
|---|---------------------|----|----|--|
| 1 | MOF                 | 4  | 4  |  |
| 2 |                     | 25 | 58 |  |
| 1 | ARRESTO CARDIAC     | 1  | 1  |  |
| 2 |                     | 7  | 50 |  |
| 1 | CID, ARRESTO CAR    | 0  | 0  |  |
| 2 |                     | 50 | 80 |  |
| 1 |                     | 29 | 62 |  |
| 2 |                     | 9  | 28 |  |
| 2 |                     | 6  | 15 |  |
| 1 | SHOCK CARDIOGE      | 3  | 3  |  |
| 2 |                     | 10 | 18 |  |
| 2 |                     | 21 | 50 |  |
| 2 |                     | 50 | 57 |  |
| 1 | MOF E SEPSI DA C    | 36 | 66 |  |
| 2 |                     | 28 | 56 |  |
| 2 |                     | 4  | 10 |  |
| 2 |                     | 25 | 98 |  |
| 2 |                     | 2  | 18 |  |
| 1 | nsufficienza epatic | 26 | 26 |  |
| 2 |                     | 20 | 34 |  |
| 1 |                     | 39 | 40 |  |
| 1 | MOF                 | 2  | 2  |  |
| 1 |                     | 17 | 17 |  |

22,24742268 44,7628866  
18,37175761 32,2205205

22,69230769 44,56043956  
18,79698103 32,38044979

26,58 56,02  
19,72990065 35,10479356

| decesso post op/peri | CAUSA DECESSO     | data decesso | 1 MESE | 3 mesi           |
|----------------------|-------------------|--------------|--------|------------------|
| 2                    |                   |              |        | 0                |
| 0                    |                   | 27/02/12     |        |                  |
| 0                    |                   | 17/03/12     |        |                  |
| 0                    |                   | 08/03/12     |        |                  |
| 0                    |                   | 25/04/12     |        |                  |
| 0                    | ima               | 22/06/11     |        |                  |
| 1                    | colecistite acuta | 28/08/13     |        | 0                |
| 2                    |                   |              |        | 0                |
| 1                    | PROGRESSIONE K    | 21/01/13     |        | DEISC FERITA     |
| 2                    |                   |              |        | 0                |
| 2                    |                   |              |        | LAPAROCELE       |
| 2                    |                   |              |        | 0                |
| 0                    |                   | 20/11/12     |        |                  |
| 1                    | INSUF RESP        | dic-14       |        | FEC              |
| 2                    |                   |              |        | LAPAROCELE       |
| 0                    |                   | 23/04/13     |        |                  |
| 1                    | PROGRESSIONE K    | 02/08/13     |        | DECESSO          |
| 2                    |                   |              |        | 0                |
| 0                    | MOF               | 05/06/12     |        |                  |
| 1                    | EMORRAGIA DIGE    | 16/03/14     |        | ricovero per sep |
| 0                    |                   | 11/08/13     |        |                  |
| 2                    |                   |              |        | LAPAROCELE, FI   |
| 2                    |                   |              |        | 0                |
| 1                    | PROGRESSIONE K    | nov-14       |        | DEISC FERITA, M  |
| 1                    | PROGRESSIONE K    | lug-14       |        | 0                |
| 2                    |                   |              |        | 0                |
| 2                    |                   |              |        | 12/2/14 PKA      |
| 0                    |                   | 23/01/14     |        |                  |
| 2                    |                   |              |        | LAPAROC          |
| 0                    | SEPSI             | 02/01/14     |        |                  |
| 2                    |                   |              |        | RERIC IN MED P   |
| 2                    |                   |              |        | 0                |
| PERSO                |                   |              |        | PERSO            |
| 2                    |                   |              |        | 0                |
| 0                    |                   | 26/05/14     |        |                  |
| 0                    |                   | 09/05/14     |        |                  |
| 2                    |                   |              |        | PERSO            |
| 2                    |                   |              |        | LAPROCELE        |
| 2                    |                   |              |        | 0                |
| 2                    |                   |              |        | LAPAROCELE       |

|   |               |          |  |                             |
|---|---------------|----------|--|-----------------------------|
| 0 |               | 03/10/14 |  |                             |
| 2 |               |          |  | 0                           |
| 2 |               |          |  | LAPAROCELE E !              |
| 2 |               |          |  | 0                           |
| 2 |               |          |  | FISTOLA                     |
| 0 |               | 13/10/14 |  |                             |
| 2 |               |          |  | 0                           |
| 1 | SHOCK SETTICO | 05/09/15 |  | 0 RERICOVERO                |
| 2 |               |          |  | 0                           |
| 2 |               |          |  | 0                           |
| 2 |               |          |  | FISTOLA EC COM              |
| 2 |               |          |  | A 2 MESI DEISC              |
| 0 |               | 06/11/14 |  |                             |
| 0 |               | 08/12/14 |  |                             |
| 2 |               |          |  | 0                           |
| 0 |               | 10/12/14 |  |                             |
| 2 |               |          |  | DEISC FERITA                |
| 2 |               |          |  | 0                           |
| 2 |               |          |  | 0                           |
| 2 |               |          |  | PERSO                       |
| 2 |               |          |  | PERSO                       |
| 2 | ?             |          |  | NO, DIALISI                 |
| 2 |               |          |  | FA CHTP, LAPAR              |
| 2 |               |          |  | NON LAPAROCI                |
| 2 |               |          |  | SEGUIDO DAGLI               |
| 2 |               |          |  | EMODIALISI, PA              |
| 2 |               |          |  | MEDICAZIONI P               |
| 2 |               |          |  | 0                           |
| 2 |               |          |  | VAC                         |
| 2 |               |          |  | a 1 mese bene,              |
| 2 |               |          |  | 0                           |
| 2 |               |          |  | EVISCERAZ COP 2 MESI DOLORE |
| 0 |               | 05/07/15 |  |                             |
| 0 |               | 05/06/15 |  |                             |

|   |                  |          |                |                |
|---|------------------|----------|----------------|----------------|
| 0 |                  | 07/06/15 |                |                |
| 2 |                  |          |                | 0              |
| 0 |                  | 01/07/15 |                |                |
| 2 |                  |          | PERSO          | PERSO          |
| 0 |                  | 28/07/15 |                |                |
| 2 |                  |          | NO             | 0              |
| 0 | MOF              | 19/09/15 |                |                |
| 2 |                  |          | NO             | 0              |
| 2 |                  |          | NO             | 0              |
| 0 |                  | 28/08/15 |                |                |
| 2 |                  |          | NO             | 0              |
| 2 |                  |          | DEISC FERITA   | 0              |
| 2 |                  |          | NO             | 0              |
| 0 | MOF E SEPSI DA C | 02/11/14 |                |                |
| 2 |                  |          | RIABILIZAZIONE | RIABILIZAZIONE |
| 2 |                  |          | NO             | 0              |
| 2 |                  |          | NO             | 0              |
| 2 |                  |          | NO             | 0              |
| 0 |                  | 17/12/15 |                |                |
| 2 |                  |          | NO             | 0              |
| 0 |                  | 13/01/16 |                |                |
| 0 |                  | 07/12/15 |                |                |
| 0 | SHOCK SETTICO    | 17/01/16 |                |                |

| 6 MESI           | 8 MESI          | 9 MESI          | 12 MESI         | 15 MESI       |
|------------------|-----------------|-----------------|-----------------|---------------|
| 0                | 0               | 0               | 0               |               |
| laparocele       | laparocele      | laparocele      | laparocele      |               |
| 0                | 0               | 0               | 0               | 0             |
| DECESSO          |                 |                 | 0               | 0             |
| 0                | 0               | 0               | 0               | 0             |
| LAPAROCELE       | LAPAROCELE      | LAPAROCELE      | LAPAROCELE      | PERSO         |
| 0                | 0               | 0               | 0               | 0             |
| 0                | 0               | 0               | 0               | 0             |
| LAPAROCELE, P NO |                 | ?               | ?               | ?             |
| 0                | 0               | 0               | 0               | 0             |
| IVU              | DECESSO         |                 |                 |               |
| LAPAROCELE, D    | LAPAROCELE, D   | LAPAROCELE, D   | LAPAROCELE, D   | DRENAGGIO ASC |
| 0                | 0               | 0               | 0               | 0             |
| DEISC FERITA, N  | DEISC FERITA, N | DEISC FERITA, N | DEISC FERITA, N | DECESSO       |
| 0                | 0               | 0               | 0               | 0             |
| 0                | 0               | 0               | 0               | 0             |
| 0                | 0               | 0               | 0               | 0             |
| LAPAROC          | LAPAROC         | LAPAROC         | LAPAROC         | LAPAROC       |
| 0                | 0               | 0               | 0               | 0             |
| 0                | 0               | 0               | 0               | 0             |
| PERSO            |                 |                 |                 |               |
| RERICOVERO PE    | 0               | 0               | 0               | 0             |
| PERSO            | PERSO           | PERSO           |                 |               |
| LAPAROCELE       | LAPAROCELE      | LAPAROCELE      | LAPAROCELE      | LAPAROCELE    |
| 0                | 0               | 0               | 0               | 0             |
| LAPAROCELE       | LAPAROCELE      | LAPAROCELE      | LAPAROCELE      |               |

|                           |                |                |                                                                           |                |
|---------------------------|----------------|----------------|---------------------------------------------------------------------------|----------------|
|                           |                |                |                                                                           |                |
| 0                         |                |                |                                                                           |                |
| LAPAROCELE E              | LAPAROCELE E   | LAPAROCELE E   | LAPAROCELE E                                                              | STIPSI         |
| 0                         | PERSO          | PERSO          | PERSO                                                                     |                |
| FISTOLA                   | FISTOLA        | FISTOLA        | FISTOLA EC BENE                                                           | IL RESTO.      |
|                           |                |                |                                                                           |                |
| PERSO                     | PERSO          | PERSO          |                                                                           |                |
| 0                         | 0              | 0              | 0                                                                         | DECEDUTA       |
| 0                         | 0              | 0              | 0                                                                         | 0              |
| 0                         | 0              | 0              | 0                                                                         |                |
| FISTOLA EC COM            | FISTOLA EC COM | FISTOLA EC COM | FISTOLA EC COM                                                            | FISTOLA EC COM |
| 0                         | 0              | 0              | 0                                                                         |                |
|                           |                |                |                                                                           |                |
| 0                         | 0              | 0              | 0                                                                         |                |
|                           |                |                |                                                                           |                |
| 0                         | 0              | 0              | 0                                                                         |                |
| 0                         | 0              | 0              | 0                                                                         | 0              |
| 0                         | 0              | 0              | 0                                                                         |                |
|                           |                |                |                                                                           |                |
| ?                         | ?              | ?              |                                                                           |                |
| ROCELE???                 |                |                |                                                                           |                |
| ELE, SIEROMA              |                |                |                                                                           |                |
|                           |                |                | SUBOCCLUSIONI<br>INTESTINALI<br>CON<br>RERICOVERI,<br>CRISI<br>EPILETTICA |                |
| SUBOCCLUSIONI INTESTINALI | SUBOCCLUSIONI  |                | , META                                                                    | recidiva, fec  |
| .RETE???                  |                |                |                                                                           |                |
| ER DEISC FERITA           |                |                |                                                                           |                |
|                           |                |                |                                                                           |                |
| rimossa la digiuno        |                |                |                                                                           |                |
| 0                         | 0              | 0              | 0                                                                         | 0              |
| EVISCERAZ COP             | EVISCERAZ COP  | EVISCERAZ COP  | EVISCERAZ COP                                                             | PERTA          |
|                           |                |                |                                                                           |                |
|                           |                |                |                                                                           |                |



|             |   |   |   |  |
|-------------|---|---|---|--|
|             |   |   |   |  |
| 0           | 0 | 0 | 0 |  |
|             |   |   |   |  |
| PERSO       |   |   |   |  |
|             |   |   |   |  |
| PERSO       |   |   |   |  |
|             |   |   |   |  |
|             |   |   |   |  |
|             |   |   |   |  |
|             |   |   |   |  |
| 0           | 0 |   |   |  |
|             |   |   |   |  |
|             |   |   |   |  |
| CON TRACHEO |   |   |   |  |
|             |   |   |   |  |
|             |   |   |   |  |
|             |   |   |   |  |
|             |   |   |   |  |
| 0           |   |   |   |  |
|             |   |   |   |  |
|             |   |   |   |  |
|             |   |   |   |  |







| LAPAROCELE SI/NO | time to ventral hernia | FOLLOW UP MAX PER PZ | data 1° intervento |
|------------------|------------------------|----------------------|--------------------|
| 2                | 53                     | 53                   | 27/12/11           |
|                  |                        | 27/02/12             | 21/01/12           |
|                  |                        | 17/03/12             | 27/01/12           |
|                  |                        | 08/03/12             | 16/02/12           |
|                  |                        | 25/04/12             | 01/04/12           |
|                  |                        | 22/06/12             | 20/04/12           |
| 1                | 6                      | 28/08/13             | 26/06/12           |
| 2                | 44                     | 44                   | 11/08/12           |
| 2                | 44                     | 21/01/13             | 22/08/12           |
| 2                | 43                     | 43                   | 03/09/12           |
| 1                | 3                      | 43                   | 12/09/12           |
| 1                | 24                     | 43                   | 27/09/12           |
|                  |                        | 20/11/12             | 13/11/12           |
| 2                | 40                     | dic-14               | 28/01/13           |
| 1                | 3                      | 39                   | 19/02/13           |
|                  |                        | 23/04/13             | 18/04/13           |
|                  |                        | 02/08/13             | 07/05/13           |
| 2                | 36                     | 36                   | 13/05/13           |
|                  |                        | 05/06/13             | 23/05/13           |
| 2                | 34                     | 16/03/14             | 18/07/13           |
|                  |                        | 11/08/13             | 22/07/13           |
| 1                | 3                      | 33                   | 01/08/13           |
| 2                | 33                     | 33                   | 06/08/13           |
| 2                | 33                     | nov-14               | 27/08/13           |
| 2                | 33                     | lug-14               | 29/08/13           |
| 2                | 32                     | 32                   | 13/09/13           |
| 1                | 12                     | 30                   | 15/11/13           |
|                  |                        | 23/01/14             | 15/11/13           |
| 1                | 3                      | 30                   | 26/11/13           |
|                  |                        | 02/01/14             | 22/12/13           |
| 2                | 28                     | 28                   | 23/01/14           |
| 2                | 27                     | 27                   | 05/02/14           |
|                  |                        | 26                   | 08/03/14           |
| 2                | 26                     | 26                   | 23/03/14           |
|                  |                        | 26/05/14             | 08/04/14           |
|                  |                        | 09/05/14             | 22/04/14           |
|                  |                        | 23                   | 07/06/14           |
| 1                | 3                      | 23                   | 21/06/14           |
| 2                | 23                     | 23                   | 23/06/14           |
| 1                | 3                      | 22                   | 28/07/14           |

|   |    |          |          |
|---|----|----------|----------|
|   |    | 03/10/14 | 04/08/14 |
| 2 | 21 | 21       | 07/08/14 |
| 1 | 3  | 21       | 07/08/14 |
| 2 | 21 | 21       | 28/08/14 |
| 1 | 3  | 20       | 10/09/14 |
|   |    | 13/10/14 | 21/09/14 |
| 2 | 20 | 20       | 27/09/14 |
| 2 | 20 | 05/09/15 | 28/09/14 |
| 2 | 26 | 50       | 19/03/14 |
| 2 | 19 | 19       | 02/10/14 |
| 1 | 15 | 19       | 21/10/14 |
| 2 | 19 | 19       | 22/10/14 |
|   |    | 06/11/14 | 05/11/14 |
|   |    | 08/12/14 | 06/11/14 |
| 2 | 18 | 18       | 29/11/14 |
|   |    | 10/12/14 | 01/12/14 |
| 2 | 17 | 17       | 06/12/14 |
| 2 | 17 | 17       | 07/12/14 |
| 2 | 17 | 17       | 08/12/14 |
|   |    | 16       | 07/01/15 |
|   |    | 16       | 23/01/15 |
| 2 | 14 | 14       | 11/03/15 |
| 1 | 3  | 14       | 16/03/15 |
| 2 | 14 | 14       | 22/03/15 |
|   |    |          |          |
| 2 | 14 | 14       | 23/03/15 |
| 2 | 14 | 14       | 27/03/15 |
| 2 | 14 | 14       | 31/03/15 |
| 2 | 13 | 13       | 11/04/15 |
| 2 | 13 | 13       | 13/04/15 |
| 2 | 13 | 13       | 22/04/15 |
| 2 | 12 | 12       | 25/05/15 |
| 1 | 3  | 12       | 26/05/15 |
|   |    | 05/07/15 | 27/05/15 |
|   |    | 05/06/15 | 05/06/15 |

|   |    |          |          |
|---|----|----------|----------|
|   |    | 07/06/15 | 06/06/15 |
| 2 | 11 | 11       | 27/06/15 |
|   |    | 01/07/15 | 30/06/15 |
|   |    | 10       | 23/07/15 |
|   |    | 28/07/15 | 28/07/15 |
| 2 | 10 | 10       | 31/07/15 |
|   |    | 19/09/15 | 08/08/15 |
| 2 | 9  | 9        | 09/08/15 |
| 2 | 9  | 9        | 25/08/15 |
|   |    | 28/08/15 | 26/08/15 |
| 2 | 9  | 9        | 31/08/15 |
| 2 | 8  | 8        | 03/09/15 |
| 2 | 8  | 8        | 17/09/15 |
|   |    | 02/11/15 | 25/09/15 |
| 1 | 3  | 7        | 05/10/15 |
| 2 | 7  | 7        | 10/10/15 |
| 2 | 6  | 6        | 11/11/15 |
| 2 | 7  | 7        | 17/10/15 |
|   |    | 17/12/15 | 22/11/15 |
| 2 | 6  | 6        | 19/11/15 |
|   |    | 13/01/16 | 05/12/15 |
|   |    | 07/12/15 | 05/12/15 |
|   |    | 17/01/16 | 17/12/15 |

17,13114754  
14  
12,53857436

media  
mediana  
sd

| overall morto si/no | time to status |    | time to status |
|---------------------|----------------|----|----------------|
| 2                   | 53             |    | 53             |
| 1                   | 27/02/12       | 37 | 1,2            |
| 1                   | 17/03/12       | 50 | 1,7            |
| 1                   | 08/03/12       | 21 | 0,7            |
| 1                   | 25/04/12       | 24 | 0,8            |
| 1                   | 22/06/12       | 63 | 2,1            |
| 2                   | 46             |    | 46             |
| 2                   | 44             |    | 44             |
| 1                   | 44             |    | 44             |
| 2                   | 43             |    | 43             |
| 2                   | 43             |    | 43             |
| 2                   | 43             |    | 43             |
| 1                   | 20/11/12       | 7  | 0,2            |
| 1                   | 40             |    | 40             |
| 2                   | 39             |    | 39             |
| 1                   | 23/04/13       | 5  | 0,2            |
| 1                   | 36             |    | 36             |
| 2                   | 36             |    | 36             |
| 1                   | 05/06/13       | 13 | 0,4            |
| 1                   | 34             |    | 34             |
| 1                   | 11/08/13       | 20 | 0,7            |
| 2                   | 33             |    | 33             |
| 2                   | 33             |    | 33             |
| 1                   | 33             |    | 33             |
| 1                   | 33             |    | 33             |
| 2                   | 32             |    | 32             |
| 2                   | 30             |    | 30             |
| 1                   | 23/01/14       | 69 | 2,3            |
| 2                   | 30             |    | 30             |
| 1                   | 02/01/14       | 11 | 0,4            |
| 2                   | 28             |    | 28             |
| 2                   | 27             |    | 27             |
| 2                   | 26             |    | 26             |
| 2                   | 26             |    | 26             |
| 1                   | 26/05/14       | 48 | 1,6            |
| 1                   | 09/05/14       | 17 | 0,6            |
| perso               | 23             |    | 23             |
| 2                   | 23             |    | 23             |
| 2                   | 23             |    | 23             |
| 2                   | 22             |    | 22             |





|       |          |    |     |
|-------|----------|----|-----|
| 1     | 07/06/15 | 1  | 0,0 |
| 2     | 11       |    | 11  |
| 1     | 01/07/15 | 1  | 0,0 |
| perso | 10       |    | 10  |
| 1     | 28/07/15 | 0  | 0,0 |
| 2     | 10       |    | 10  |
| 1     | 19/09/15 | 42 | 1,4 |
| 2     | 9        |    | 9   |
| 2     | 9        |    | 9   |
| 1     | 28/08/15 | 2  | 0,1 |
| 2     | 9        |    | 9   |
| 2     | 8        |    | 8   |
| 2     | 8        |    | 8   |
| 1     | 02/11/15 | 38 | 1,3 |
| 2     | 7        |    | 7   |
| 2     | 7        |    | 7   |
| 2     | 6        |    | 6   |
| 2     | 7        |    | 7   |
| 1     | 17/12/15 | 25 | 0,8 |
| 2     | 6        |    | 6   |
| 1     | 13/01/16 | 39 | 1,3 |
| 1     | 07/12/15 | 2  | 0,1 |
| 1     |          |    |     |
